# Supplementary material for: Tear and Saliva Metabolomics in Evaporative Dry Eye Disease in Females
Source: MDPI journal article supplement (doi:10.3390/metabo13111125), 2023-11-02
Supplement: s1 [file s1]

| Positive ionization - Increased in patients            |                  |                  |          |                               |                                 |                                      | P_value controls | P_value patients | Mann-Whitney U test |    |
|--------------------------------------------------------|------------------|------------------|----------|-------------------------------|---------------------------------|--------------------------------------|------------------|------------------|---------------------|----|
| Name                                                   | Formula          | Molecular Weight | RT [min] | Ratio: (Patient) / (Control)  | P-value: (Patient) / (Control)  | Adj. P-value: (Patient) / (Control)  | Shapiro-Wilk     | Shapiro-Wilk     |                     |    |
| Spermine                                               | C10 H26 N4       | 202.21572        | 1.426    | 2.292                         | 0.036183746                     | 0.1334355                            | 0.004            | 0.009            | .025 <sup>b</sup>   |    |
| Spermidine                                             | C7 H19 N3        | 145.15788        | 1.489    | 2.205                         | 0.002922715                     | 0.040120087                          | 0.039            | 0.296            | .003 <sup>b</sup>   |    |
| Triethanolamine                                        | C4 H12 N2 O2     | 120.08982        | 2.264    | 39.672                        | 0.001791744                     | 0.031385379                          | <.001            | 0.024            | .003 <sup>b</sup>   |    |
|                                                        | C6 H16 N2 O3     | 164.11602        | 2.294    | 36.528                        | 8.76099E-05                     | 0.010649572                          | <.001            | 0.901            | <.001 <sup>b</sup>  |    |
|                                                        | C6 H15 N O3      | 149.10513        | 2.307    | 3.929                         | 0.038607381                     | 0.137621729                          | 0.002            | 0.005            | .059 <sup>b</sup>   |    |
|                                                        | C5 H13 N O2      | 119.0946         | 2.316    | 2.809                         | 0.002823107                     | 0.040120087                          | 0.011            | 0.479            | .007 <sup>b</sup>   |    |
|                                                        | C8 H19 N O4      | 193.13135        | 2.32     | 64.928                        | 0.000517755                     | 0.015115568                          | <.001            | 0.908            | <.001 <sup>b</sup>  |    |
|                                                        | C7 H17 N O3      | 163.12077        | 2.357    | 5.851                         | 0.000340984                     | 0.01185302                           | <.001            | 0.86             | <.001 <sup>b</sup>  |    |
|                                                        | C2 H2 N4 O2 S    | 145.98914        | 2.669    | 2.119                         | 0.018090612                     | 0.092778509                          | 0.215            | <.001            | .002 <sup>b</sup>   |    |
|                                                        | C10 H23 N O5     | 237.15753        | 2.698    | 60.779                        | 0.000114486                     | 0.010649572                          | <.001            | <.001            | <.001 <sup>b</sup>  |    |
|                                                        | C9 H19 N O4      | 205.13134        | 2.75     | 327.4                         | 0.000328932                     | 0.01185302                           | <.001            | 0.686            | <.001 <sup>b</sup>  |    |
|                                                        | C8 H19 N O3      | 177.13641        | 2.87     | 22.97                         | 0.00091706                      | 0.019669992                          | <.001            | 0.184            | <.001 <sup>b</sup>  |    |
| D-(-)-Carnitine                                        | C7 H15 N O3      | 161.10509        | 2.954    | 18.566                        | 0.006796324                     | 0.053877179                          | <.001            | 0.126            | .020 <sup>b</sup>   |    |
| O-(2-aminoethyl)serine                                 | C5 H12 N2 O3     | 148.08471        | 3.399    | 13.346                        | 0.002002042                     | 0.032877277                          | <.001            | 0.45             | .002 <sup>b</sup>   |    |
|                                                        | C11 H8 S         | 172.03471        | 3.427    | 6.295                         | 0.006046151                     | 0.051909263                          | 0.009            | 0.855            | .008 <sup>b</sup>   |    |
|                                                        | C11 H23 N O5     | 249.15755        | 3.836    | 261.345                       | 0.000171795                     | 0.010649572                          | <.001            | 0.531            | <.001 <sup>b</sup>  |    |
| Diethylene glycol                                      | C4 H10 O3        | 106.06295        | 4.12     | 3.689                         | 0.000784192                     | 0.019167104                          | 0.005            | 0.232            | .001 <sup>b</sup>   |    |
| 3-hydroxybutyric acid                                  | C4 H8 O3         | 104.04735        | 5.82     | 2.173                         | 0.038729096                     | 0.137621729                          | 0.076            | 0.046            | .059 <sup>b</sup>   |    |
| (2S)-2-Piperazinecarboxylic acid                       | C5 H10 N2 O2     | 130.07424        | 7.408    | 15.992                        | 0.00293934                      | 0.040120087                          | <.001            | 0.074            | .002 <sup>b</sup>   |    |
|                                                        | C7 H11 N2 O5 P   | 234.04154        | 8.005    | 2.083                         | 0.001993033                     | 0.032877277                          | 0.101            | 0.54             | .001 <sup>b</sup>   |    |
| Daminozide                                             | C6 H12 N2 O3     | 160.08468        | 8.224    | 10.688                        | 0.002284889                     | 0.036944896                          | <.001            | 0.568            | .004 <sup>b</sup>   |    |
|                                                        | C14 H11 F N2 O   | 242.08781        | 10.624   | 39.144                        | 0.000148942                     | 0.010649572                          | <.001            | 0.691            | <.001 <sup>b</sup>  |    |
|                                                        | C5 H8 N8 O       | 196.08232        | 11.53    | 6.015                         | 0.003858806                     | 0.044567083                          | <.001            | 0.746            | .003 <sup>b</sup>   |    |
|                                                        | C32 H59 N2 O4 P3 | 628.36901        | 11.916   | 3.855                         | 0.031244789                     | 0.122350252                          | <.001            | 0.008            | .035 <sup>b</sup>   |    |
|                                                        | C11 H4 N10       | 276.0609         | 12.676   | 5.103                         | 0.000896                        | 0.019618671                          | 0.004            | <.001            | .002 <sup>b</sup>   |    |
| Glycyltyrosine                                         | C11 H14 N2 O4    | 238.09536        | 12.945   | 301.056                       | 0.000226078                     | 0.011026434                          | <.001            | 0.003            | <.001 <sup>b</sup>  |    |
|                                                        |                  | 181.09909        | 13.119   | 2.142                         | 0.046786694                     | 0.15132672                           | 0.069            | 0.505            | .035 <sup>b</sup>   |    |
|                                                        | C11 H14 N2 O4    | 238.09518        | 13.153   | 94.455                        | 0.000170913                     | 0.010649572                          | <.001            | 0.64             | <.001 <sup>b</sup>  |    |
|                                                        | C24 H20 O7       | 420.12056        | 13.684   | 7.111                         | 0.006152765                     | 0.051909263                          | 0.01             | 0.89             | .008 <sup>b</sup>   |    |
| Dacarbazine                                            | C6 H10 N6 O      | 182.09174        | 13.759   | 2.711                         | 0.015934596                     | 0.084873119                          | <.001            | 0.001            | .053 <sup>b</sup>   |    |
|                                                        | C11 H20 N2 O     | 196.15751        | 13.905   | 2.197                         | 0.038760437                     | 0.137621729                          | 0.14             | 0.549            | .010 <sup>b</sup>   |    |
| 12-Hydroxylauric acid                                  | C12 H24 O3       | 216.17237        | 14.277   | 2.948                         | 0.011884076                     | 0.071782554                          | 0.002            | 0.77             | .016 <sup>b</sup>   |    |
|                                                        | C18 H21 N4 O6 P  | 420.12056        | 14.477   | 11.377                        | 0.008662627                     | 0.063937003                          | 0.007            | 0.59             | .011 <sup>b</sup>   |    |
|                                                        | C17 H18 N2 O4    | 314.12633        | 14.49    | 29.326                        | 0.049468962                     | 0.151579693                          | <.001            | 0.016            | .101 <sup>b</sup>   |    |
|                                                        | C16 H24 O8       | 366.12864        | 14.717   | 2.574                         | 0.010170171                     | 0.067900068                          | 0.199            | 0.033            | .003 <sup>b</sup>   |    |
|                                                        | C12 H20 N6 O3    | 296.15979        | 15.136   | 3.602                         | 0.006223185                     | 0.051909263                          | 0.005            | 0.016            | <.001 <sup>b</sup>  |    |
|                                                        |                  |                  |          |                               |                                 |                                      |                  |                  | n =                 | 32 |
| Positive ionization - Decreased in patients            |                  |                  |          |                               |                                 |                                      |                  |                  |                     |    |
| Name                                                   | Formula          | Molecular Weight | RT [min] | Ratio: (Patient) / (Kontroll) | P-value: (Patient) / (Kontroll) | Adj. P-value: (Patient) / (Kontroll) | Shapiro-wilk     | Shapiro-wilk     |                     |    |
| ETHANOLAMINE                                           | C2 H7 N O        | 61.053           | 2.19     | 0.34                          | 0.000690966                     | 0.018954504                          | 0.098            | 0.422            | <.001 <sup>b</sup>  |    |
| Triethanolamine                                        | C5 H11 N O4      | 149.06873        | 2.291    | 0.266                         | 0.003703007                     | 0.044309369                          | 0.025            | 0.049            | <.001 <sup>b</sup>  |    |
| Bicine                                                 | C6 H13 N O4      | 163.08441        | 2.296    | 0.133                         | 0.004993746                     | 0.049651358                          | 0.472            | <.001            | .001 <sup>b</sup>   |    |
| Diethanolamine                                         | C4 H11 N O2      | 105.07897        | 2.405    | 0.124                         | 0.004555109                     | 0.047874198                          | 0.11             | <.001            | .007 <sup>b</sup>   |    |
| Pyridoxal                                              | C8 H9 N O3       | 167.0582         | 3.255    | 0.389                         | 0.001016565                     | 0.01978537                           | 0.76             | <.001            | <.001 <sup>b</sup>  |    |
| Inosine                                                | C10 H12 N4 O5    | 268.08075        | 7.027    | 0.383                         | 0.04775011                      | 0.15132672                           | 0.33             | 0.017            | .078 <sup>b</sup>   |    |
| D-Panthenol                                            | C9 H19 N O4      | 205.13136        | 10.625   | 0.044                         | 0.015164293                     | 0.082943236                          | 0.003            | <.001            | .012 <sup>b</sup>   |    |
| 1,2-Cyclohexanediol                                    | C6 H12 O2        | 116.0837         | 12.319   | 0.038                         | 0.027617181                     | 0.114658842                          | 0.028            | <.001            | .101 <sup>b</sup>   |    |
|                                                        | C8 H15 N2 O5 P   | 250.07275        | 12.323   | 0.043                         | 0.044073415                     | 0.146123529                          | 0.022            | <.001            | .306 <sup>b</sup>   |    |
| 5-Hydroxydecanoic acid                                 | C10 H20 O3       | 188.14117        | 13.035   | 0.114                         | 0.038423239                     | 0.137621729                          | 0.001            | <.001            | .191 <sup>b</sup>   |    |
|                                                        | C10 H22 O4       | 206.15178        | 13.046   | 0.034                         | 0.042838894                     | 0.144107073                          | 0.002            | <.001            | .093 <sup>b</sup>   |    |
|                                                        | C7 H14 N3 O4 P   | 235.07321        | 13.21    | 0.249                         | 0.005524259                     | 0.050486926                          | 0.089            | 0.05             | .001 <sup>b</sup>   |    |
|                                                        | C5 H11 N6 O3 P   | 234.06404        | 13.21    | 0.49                          | 0.003752173                     | 0.044309369                          | 0.093            | 0.002            | .001 <sup>b</sup>   |    |
| Hydroquinone                                           | C6 H6 O2         | 110.03679        | 13.706   | 0.104                         | 0.012999939                     | 0.074660853                          | 0.054            | <.001            | .039 <sup>b</sup>   |    |
| Oleamide                                               | C18 H35 N O      | 281.2717         | 19.06    | 0.226                         | 0.000318803                     | 0.01185302                           | 0.064            | <.001            | <.001 <sup>b</sup>  |    |
| Hydroxydocosanoic acid                                 | C22 H44 O3       | 356.32878        | 21.385   | 0.399                         | 0.004787016                     | 0.04932504                           | 0.859            | 0.049            | .007 <sup>b</sup>   |    |
|                                                        |                  |                  |          |                               |                                 |                                      |                  |                  | n =                 | 11 |
| Negative ionization - Increased in patients            |                  |                  |          |                               |                                 |                                      |                  |                  |                     |    |
| Name                                                   | Formula          | Molecular Weight | RT [min] | Ratio: (Patient) / (Kontroll) | P-value: (Patient) / (Kontroll) | Adj. P-value: (Patient) / (Kontroll) | Shapiro-wilk     | Shapiro-wilk     |                     |    |
|                                                        | C5 H13 N5 P2     | 205.0638         | 2.396    | 3.972                         | 0.023510477                     | 0.103299694                          | 0.045            | 0.009            | .001 <sup>b</sup>   |    |
| 3-(3-Hydroxy-4-methoxyphenyl)-2-oxiranecarboxylic acid | C10 H10 O5       | 210.05307        | 12.631   | 4.263                         | 0.001686027                     | 0.103299694                          | 0.014            | 0.009            | .001 <sup>b</sup>   |    |
| Silandrin                                              | C25 H22 O9       | 466.12682        | 13.721   | 7.695                         | 0.005644712                     | 0.103299694                          | 0.011            | 0.565            | .008 <sup>b</sup>   |    |
| Arachidonic acid                                       | C20 H32 O2       | 304.24057        | 20.442   | 2.102                         | 0.027967034                     | 0.103299694                          | 0.057            | 0.015            | .039 <sup>b</sup>   |    |
| Retinyl acetate                                        | C22 H32 O2       | 328.24064        | 21.014   | 5.128                         | 0.012091755                     | 0.103299694                          | 0.018            | 0.001            | .012 <sup>b</sup>   |    |
|                                                        |                  |                  |          |                               |                                 |                                      |                  |                  | n =                 | 5  |
| Negative ionization - Decreased in patients            |                  |                  |          |                               |                                 |                                      |                  |                  |                     |    |
| Name                                                   | Formula          | Molecular Weight | RT [min] | Ratio: (Patient) / (Kontroll) | P-value: (Patient) / (Kontroll) | Adj. P-value: (Patient) / (Kontroll) | Shapiro-wilk     | Shapiro-wilk     |                     |    |
| 2-(alpha-D-mannosyl)-D-glyceric acid                   | C9 H16 O9        | 268.07942        | 2.808    | 0.018                         | 0.008603229                     | 0.103299694                          | <.001            | <.001            | .152 <sup>b</sup>   |    |
| Panthenol                                              | C9 H19 N O4      | 205.13163        | 10.603   | 0.053                         | 0.021710298                     | 0.103299694                          | 0.003            | <.001            | .020 <sup>b</sup>   |    |
| 3,4,5-trimethoxycinnamic acid                          | C12 H14 O5       | 238.08436        | 13.183   | 0.007                         | 0.003354868                     | 0.103299694                          | 0.012            | <.001            | .003 <sup>b</sup>   |    |
| Resorcinol                                             | C6 H6 O2         | 110.03682        | 13.704   | 0.091                         | 0.008970187                     | 0.103299694                          | 0.047            | <.001            | .028 <sup>b</sup>   |    |
|                                                        | C16 H14 O6       | 302.07937        | 13.729   | 0.458                         | 0.009411666                     | 0.103299694                          | 0.01             | <.001            | .008 <sup>b</sup>   |    |
| Hydroxydocosanoic acid                                 | C22 H44 O3       | 356.32952        | 21.381   | 0.424                         | 0.006690856                     | 0.103299694                          | 0.407            | 0.04             | .011 <sup>b</sup>   |    |
| Adipid adic di(2-ethylhexyl) ester                     | C22 H42 O4       | 370.30889        | 21.415   | 0.456                         | 0.01157665                      | 0.103299694                          | 0.466            | 0.018            | .011 <sup>b</sup>   |    |
|                                                        |                  |                  |          |                               |                                 |                                      |                  |                  | n =                 | 6  |
| Salvia                                                 |                  |                  |          |                               |                                 |                                      |                  |                  |                     |    |
| Name                                                   | Formula          | Molecular Weight | RT [min] | Ratio: (Patient) / (Kontroll) | P-value: (Patient) / (Kontroll) | Adj. P-value: (Patient) / (Kontroll) | Shapiro-wilk     | Shapiro-wilk     |                     |    |
| Hypotaourine                                           | C2 H7 N O2 S     | 109.01979        | 2.276    | 0.36                          | 0.009773547                     | 0.659960878                          | 0.122            | 0.012            | .015 <sup>b</sup>   |    |
| Fluorescein                                            | C20 H12 O5       | 332.0681         | 14.106   | 11.822                        | 9.19982E-06                     | 0.00624668                           | 0.52             | <.001            | .003 <sup>b</sup>   |    |
|                                                        |                  |                  |          |                               |                                 |                                      |                  |                  | Total significant=  | 5  |
